# Supplementary material for: Hydrodynamics of shape-driven rigidity transitions in motile tissues
Source: Royal Society of Chemistry journal article supplement (doi:10.1039/c8sm00446c), 2018-01-01
Supplement: c8sm00446c1.pdf [file c8sm00446c1.pdf]

## Captions for SI videos

Michael Czajkowski,<sup>1</sup> Dapeng Bi,<sup>2</sup> M. Lisa Manning,<sup>1</sup> and M. Cristina Marchetti<sup>1</sup>

<sup>1</sup>*Physics Department and Soft Matter Program, Syracuse University*

<sup>2</sup>*Department of Physics, Northeastern University, Boston, MA 02115*

(Dated: March 3, 2018)

The attached four videos display examples of the pattern formation described in the main text. In all movies the color scale is as given in Fig. 5 and refers to the value of the local cell shape anisotropy  $m(\mathbf{x}, t)$ , with  $m = 0$  (white) corresponding to a solid and  $m \neq 0$  (blue to green) to a liquid. The red arrows represent local polarization  $\mathbf{p}(\mathbf{x}, t)$ , with the length of the arrows proportional to the magnitude of polarization. The four movies correspond to the states labeled  $A - D$  in the phase diagram of Fig. 5. Each simulation is initialized in the steady state predicted by the mean field theory for the corresponding values of parameters, with a superimposed small spatially uncorrelated noise. For states  $B$ ,  $C$ , and  $D$  the initial polarization is chosen to point vertically up. Each simulation is run with parameters  $(a, s_0, \nu)$  specified individually in the caption, parameters  $(\alpha_p^0, D, D_p) = 0.5$  and all other parameters set to one, reflecting the analysis in the main text.

*a. SI Video 1: phase point A in Fig 5* The video displays the formation of liquid droplets in a solid matrix. The polarization is directed from the fluid to the solid. It is largest at the solid-fluid boundary and

forms outward pointing asters, corresponding to positive splay.

*b. SI Video 2: phase point B in Fig 5* The video displays the formation of solid islands in a liquid matrix. The polarization is directed from the fluid to the solid. It is largest at the solid-fluid boundary and forms inward pointing asters, corresponding to negative splay. Here  $a = 1.5$ ,  $s_0 = 4.15$  and  $\nu = 1$ .

*c. SI Video 3: phase point C in Fig 5* The video displays the formation of liquid bands in a solid matrix, with polarization directed normal to the long direction of the bands and pointing from the liquid to the solid. Here  $a = 2.5$ ,  $s_0 = 3.9$  and  $\nu = 1$ .

*d. SI Video 4: phase point D in Fig 5* The video displays the formation of liquid bands traveling in a solid matrix. There is a net polarization normal to the long direction of the bands that travel in the direction opposite to that of mean polarization. This is reminiscent of “traffic shockwaves”, where a low density region of cars in a traffic jam is found to travel opposite to the direction of traffic flow. Here  $a = 3.5$ ,  $s_0 = 3.88$  and  $\nu = -1$ .
